# Supplementary material
Source: PubMed Central journal article supplement (PMC5625483)
Supplement: 91.20.e01059-17_zjv020172970so9.pdf [file 91.20.e01059-17_zjv020172970so9.pdf]

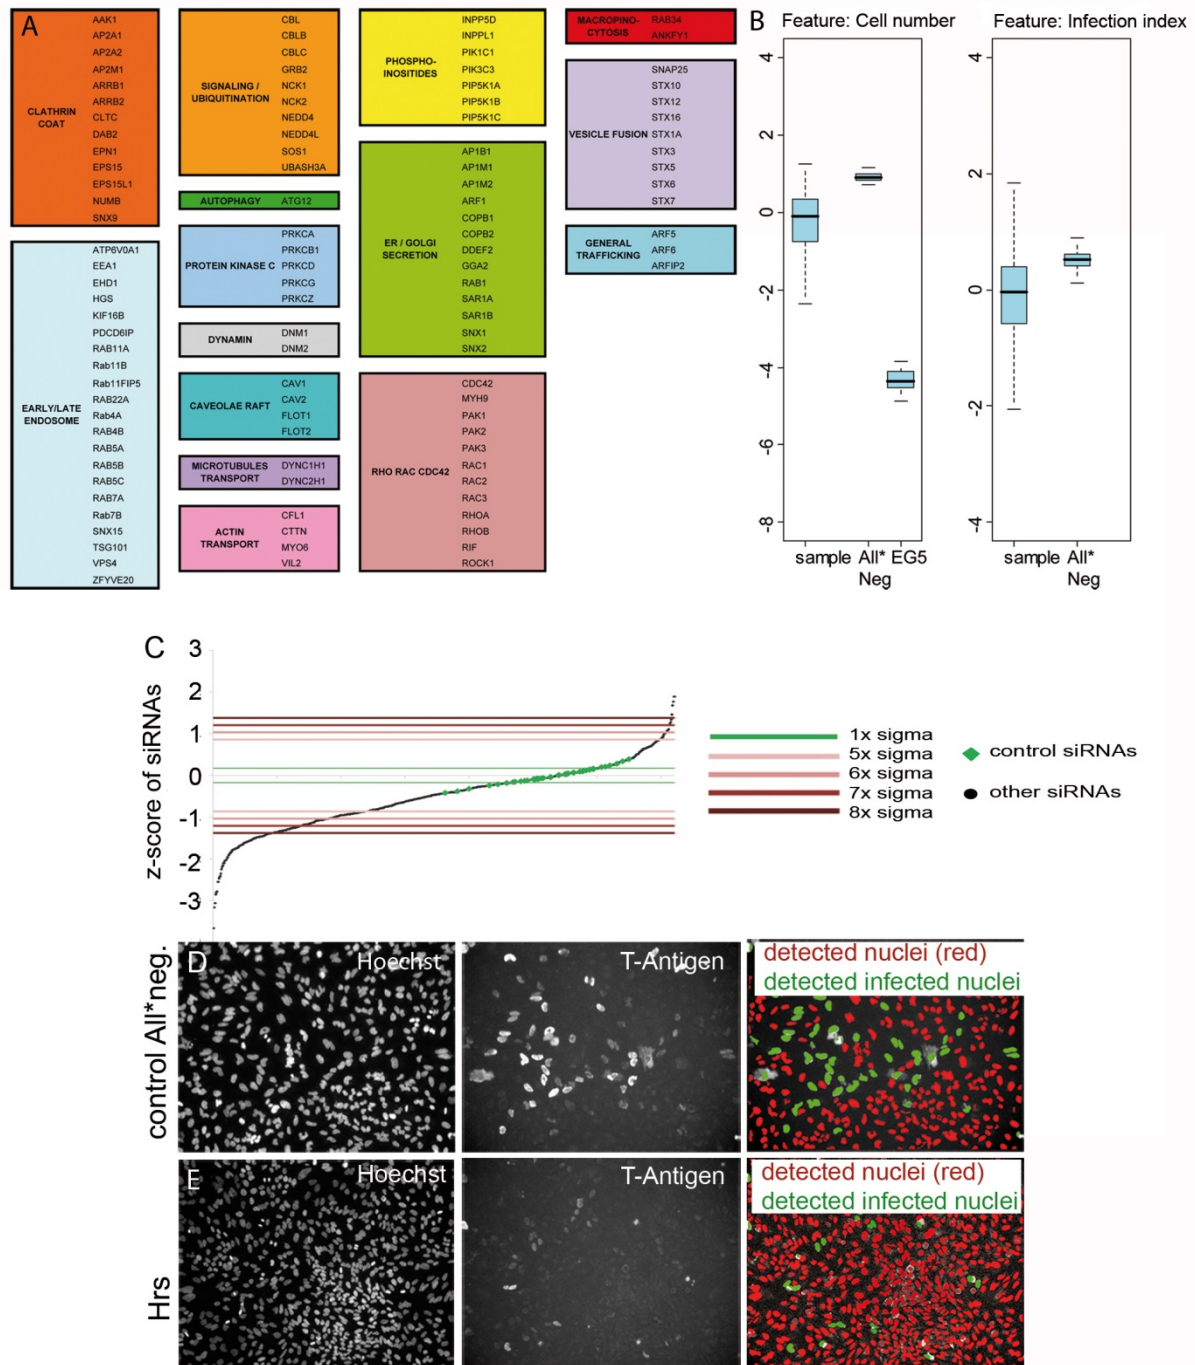

Supplemental Figure S1: siRNA screen

(A) Figure S1A shows all 108 proteins targeted in the siRNA screen sorted according to their assumed function. (B) Figure S1B shows the range of effects that transfection with siRNAs had on the cell number and on the infection index in the full set of samples analyzed. Also shown is the effect of a nontargeting siRNA control (AllStarsNegative) and a transfection control (Hs\_KIF11\_6/EG5; Qiagen), which were present in every plate. (C) Figure S1C shows the average z-score of infection and one, five, six, seven, and eight times (1x, 5x, 6x, 7x, 8x) the standard deviation (sigma) of the z-scores of all negative-control siRNAs. (D) Figure S1D shows fixed cells of the negative control AllStarsNegative: The first image shows all nuclei stained with Hoechst, the second image shows nuclei infected by SV40 visualized through indirect immunofluorescence using antibodies against the SV40 T-Antigen, and the third image shows a combination of the two previous images used for automated image analysis. (E) Figure S1E resembles S1D except that cells were targeted with siRNA against the protein Hrs/Hgs.
