# Supplementary material
Source: PubMed Central journal article supplement (PMC5625483)
Supplement: 91.20.e01059-17_zjv020172970so10.pdf [file 91.20.e01059-17_zjv020172970so10.pdf]

S2

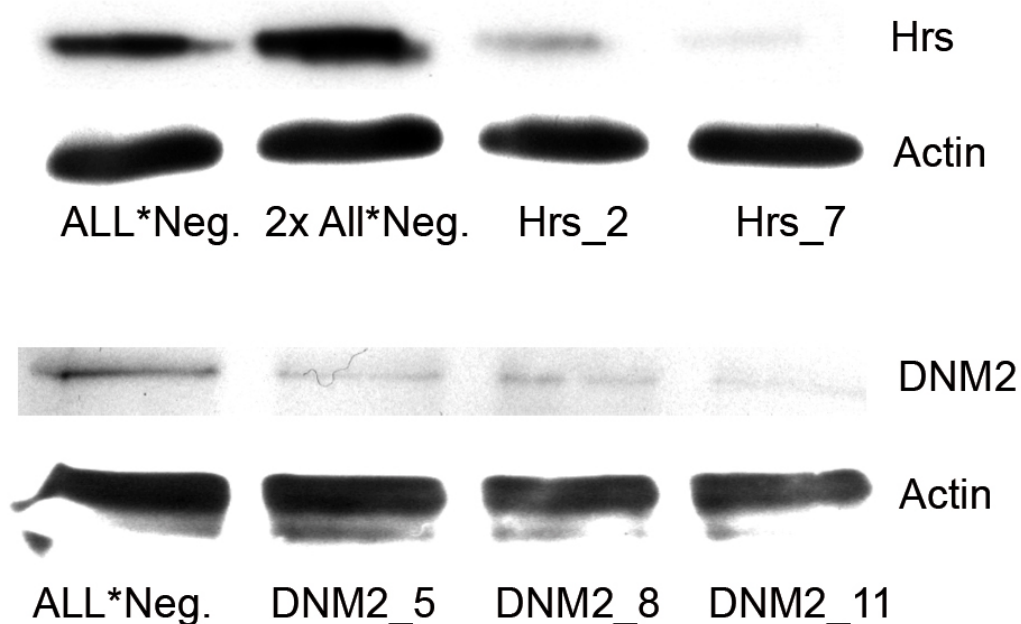

**Supplemental Figure 2: Quantitative analysis of Western blots**

As an example for knock-down levels achieved during the screen, Western Blots visualizing the expression levels of the two proteins Hrs and DNM2 are shown. Knock-down levels were calculated by comparing the expression levels of the respective protein when targeted by the respective siRNAs compared to the negative control ALL\*Neg. Actin expression levels served as loading controls. In lane "2x ALL\*Neg.," double the amount of the control siRNA sample AllStarsNegative was loaded. The number following the protein name (e.g. Hrs\_2) indicates the number of the siRNA.
